## CASE REPORT

# Drug-induced lupus erythematosus associated with donepezil: a case report

CIRO MANZO<sup>1</sup>, SALVATORE PUTIGNANO<sup>2</sup>

<sup>1</sup>Gerontorheumatologic Outpatient Service, Mariano Lauro Hospital, Naples 80063, Italy

<sup>2</sup>Alzheimer Evaluation Unit, ASL Napoli Centro, Naples, Italy

Address correspondence to: C. Manzo. Tel: (+39) 081 872 43 20/338 943 67 90; Fax: (+39) 081 533 14 47. Email: [cimanzo@libero.it](mailto:cimanzo@libero.it)

## Abstract

The possibility that drug-induced lupus erythematosus (DILE) can be induced by donepezil is presented in this clinical case. Donepezil is an inhibitor of acetylcholinesterase used for the treatment of Alzheimer's disease. It is the first time that donepezil causes DILE.

**Keywords:** donepezil, Alzheimer's disease, drug-induced lupus erythematosus, older people

The occurrence of systemic lupus erythematosus (SLE) as a result of pharmacological treatments is a condition named drug-related lupus (DRL) or drug-induced lupus erythematosus (DILE). This disorder has been described for the first time in 1945 by Hoffman [1]. We report the clinical case of an 80-year-old woman in which a framework of DILE was induced by donepezil. On November 2012, this woman came to our attention for the skin rash on her face (Figure 1), widespread arthromyalgia mainly in the lower limbs, dyspnoea and positive antinuclear antibodies (ANA) (1:640, homogeneous pattern on HEp-2 cells). For >20 years, she was on therapy with antihypertensive, nitroderivative patch 5 mg, aspirin 100 mg, 300 mg allopurinol and omeprazole 10 mg. Two months earlier, after an examination at the Alzheimer Evaluation Unit (AEU) located in her district, she had started a therapy with donepezil (10 mg) for primary dementia of the Alzheimer type. After evaluation (Table 1), the replacement of donepezil with memantine 20 mg/day (according to International titolation) was suggested. The replacement of donepezil was necessary for the elongation of the QTc, whereas the introduction of memantine was justified by the absence of cardiac side-effects associated with this drug. After this change, we observed complete disappearance of polyarthralgias and myalgias, the resorption of pericardial effusion, the normalisation of CRP and of QTc with progressive reduction of ESR (32), ANA (1:160) and anti-histone antibodies until their clearance (Table 1). On July 2013, the patient autonomously decided to take some tablets of donepezil that she still had at home (she had finished the memantine and neither the primary care physician nor the AEU specialist

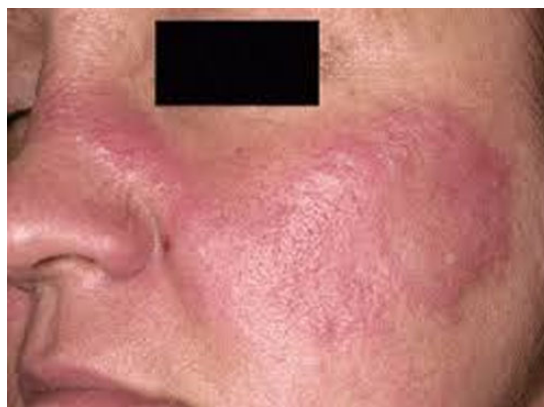

**Figure 1.** Malar rash appeared in our patient during therapy with donepezil.

was available). After a week of this occasional reintroduction, polyarthralgias with marked functional limitation, widespread myalgia and petechiae in the legs associated with other manifestations reappeared. In Table 1, we display all the results on the drug, after drug withdrawal and after its occasional new intake. She was advised to give back the residual donepezil to her geriatrician. We gave prednisone 25 mg/day in the first week, followed by gradual dose reduction. Currently, she continues the treatment with memantine. She has no longer presented any manifestation compatible for SLE. The study on her HLA type did not provide any significant information; for example HLA-DR2, DR3 and B8 (usually present in patients affected by LES) were absent. In the elderly subjects, frequently treated

Table 1. Clinical, laboratory and instrumental data in our patient

**On the first assumption of donepezil (2 months earlier)**

## Clinical manifestation

Skin rash on her face (Figure 1)  
Dyspnoea  
Widespread arthromyalgia mainly in the lower limbs

## Laboratory data

ESR = 48 mm/h  
CRP = 18 mg/l versus <6  
ANA = 1:640, homogeneous pattern on HEp-2 cells  
Absence of anti-ENA and of anti-dsDNA antibodies  
High anti-histone antibodies (+++)  
BUN = 67 mg/dl (<50); creatinine = 1.57 mg/dl (<1.10 mg/dl)  
The presence of red blood cells (RBC) and RBC casts in the urine  
Normal values of complement factors 3 and 4 (C3, C4)  
Normal liver and thyroid indices

## Instrumental data

Echocardiogram: pericarditis with minimum circumferential pericardial effusion on  
ECG: elongation of QTc (0.51 s, reference values <0.48)

**After donepezil withdrawal**

Progressive disappearance of the rash  
Complete disappearance of polyarthralgias and myalgias  
Resorption of pericardial effusion  
Normalisation of CRP and QTc  
Reduction of ESR (=32 mm/h), ANA (1:160, homogeneous pattern)

Anti-histone antibodies progressively decreasing until clearance

Progressive normalisation of urinary sediment

**After donepezil re-introduction (a week)**

Polyarthralgias with marked functional limitation, widespread myalgia  
Petechiae in the legs

Gross haematuria and RBC casts at microscopic examination of the urine sample

ESR = 47 mm/h; PCR = 6 mg/l; RBC = 2,450,000 mmc/l with Hb = 8.8 g/dl; platelets = 25,000 mmc/l; normal white blood cells and values of C3; C4 = 8 g/dl (>20)

ANA = 1:1,320 (homogeneous pattern); absence of anti-ENA and anti-dsDNA antibodies; recurrence of anti-histone antibodies (++)

Normal liver and thyroid indices; creatinine = 1.87 mg/dl versus <1.10 mg/dl

Pericarditis was excluded by a control echocardiography. An ECG control revealed QTc elongation (0.50 s versus <0.48)

with many drugs, determining what is (or may be) the responsible one for DILE is problematic. Besides, some manifestations of DILE are comparable with those of late-onset idiopathic SLE [2]. Donepezil is an inhibitor of acetylcholinesterase used for the treatment of Alzheimer's disease. Our patient presented a DILE induced by donepezil. The drug withdrawal caused the spontaneous regression and its occasional reintroduction caused the re-appearance of a frame compatible with SLE. The slight discordance in the manifestations after the first and the second cycles of donepezil does not exclude the diagnosis of DILE, because it is known that the same drug can induce different frameworks even in the same patient [3, 4]. After the second episode, no manifestations compatible with SLE appeared. No additional reports about donepezil-induced DILE are present in the literature [5].

**Key points**

- Drug-induced lupus erythematosus induced by donepezil.
- Donepezil in Alzheimer's disease.
- Cardiotoxicity by donepezil.

**Conflicts of interest**

None declared.

**References**

1. Hoffman BJ. Sensitivity of sulfadiazine resembling acute disseminated lupus erythematosus. *Arch Dermatol Syph* 1945; 51: 190.
2. Foadd BSI, Sheon RP, Kirsner AB. Systemic lupus erythematosus in the elderly. *Arch Int Med* 1972; 130: 743.
3. Araujo-Fernandez S, Ahijón-Lana M, Isenberg DA. Drug-induced lupus: including anti-tumour necrosis factor and interferon induced. *Lupus* 2014; 23: 545–53.
4. Joy MS, Dooley MA. Drug-induced lupus. In: Hochberg MC, Silman AJ, Smolen JS *et al.*, eds. *Rheumatology*, 5th edition. Elsevier, 2011; 1296–8.
5. PubMed. Gov, consulted on 21 march 2015 (drug related lupus, donepezil, lupus induced by donepezil).

**Received 22 March 2015; accepted in revised form 17 June 2015**
